# Supplementary material for: Black Soldier Fly Larvae’s Optimal Feed Intake and Rearing Density: A Welfare Perspective (Part II)
Source: MDPI journal article supplement (doi:10.3390/insects16010005), 2024-12-26
Supplement: s1 [file s1]

# Black soldier fly larvae optimal feed intake and rearing density: a welfare perspective (Part II)

Arianna Cattaneo<sup>1</sup>, Simona Belperio<sup>2</sup>, Luca Sardi<sup>2</sup>, Giovanna Martelli<sup>2</sup>, Eleonora Nannoni<sup>2</sup>, Sihem Dabbou<sup>1,\*</sup>, Marco Meneguz<sup>3</sup>

- <sup>1</sup> Center Agriculture Food Environment (C3A), University of Trento, San Michele All'Adige, 38098, TN, Italy; arianna.cattaneo@unitn.it (A.C); sihem.dabbou@unitn.it (S.D)  
<sup>2</sup> Department of Veterinary Sciences (DIMEVET), University of Bologna, Ozzano dell'Emilia, 40064, BO, Italy; simona.belperio2@unibo.it (S.B); luca.sardi@unibo.it (L.S); giovanna.martelli@unibo.it (G.M); eleonora.nannoni2@unibo.it (E.N).  
<sup>3</sup> BEF Biosystems s.r.l., Torino, 10156, TO, Italy; marco.meneguz@bef.bio (M.M)

**Table S1.** Rearing performance of black soldier fly larvae reared applying different diet (C and O) and feeding rate (50, 100, 200) (mean values, n=4).

| Diet<br>Feeding<br>Rate  | C      |        |        | O      |        |        |
|--------------------------|--------|--------|--------|--------|--------|--------|
|                          | 50     | 100    | 200    | 50     | 100    | 200    |
| Final larval weight (mg) | 47.53  | 82.33  | 143.49 | 72.12  | 125.17 | 176.64 |
| Final larval biomass (g) | 116.80 | 194.17 | 306.90 | 181.07 | 320.45 | 432.42 |
| Final frass biomass (g)  | 173.30 | 358.10 | 546.40 | 94.87  | 260.22 | 524.90 |
| Growth rate (mg/day)     | 3.13   | 8.10   | 9.82   | 6.642  | 14.22  | 12.58  |
| Substrate reduction (%)  | 78.34  | 77.62  | 82.92  | 88.14  | 83.73  | 83.60  |
| Feed Conversion Ratio    | 9.57   | 8.72   | 10.44  | 5.43   | 4.99   | 7.02   |
| WRI (%)                  | 11.19  | 11.09  | 6.91   | 12.59  | 11.96  | 6.97   |
| ECD (%)                  | 0.18   | 0.16   | 0.12   | 0.26   | 0.24   | 0.16   |
| Larval length (cm)       | 1.20   | 1.42   | 2.04   | 1.35   | 1.54   | 1.91   |
| Real FR (mg/larva/day)   | 57.14  | 114.28 | 133.33 | 57.14  | 114.28 | 133.34 |
| SuR (%) <sup>(*)</sup>   | 96.00  | 99.00  | 92.75  | 88.14  | 83.73  | 83.59  |

Abbreviations C: control diet, O: Omnivorous diet; 50: feeding rate of 50 mg feed/larva/day; 100: feeding rate of 100 mg feed/larva/day; 200: feeding rate of 200 mg feed/larva/day. WRI: waste reduction index; ECD: efficiency of conversion of digested food; SuR: survival rate (\*) see lines 209-210 for M&M.

**Table S2.** Rearing performance of black soldier fly larvae reared applying different diet (C and O) and rearing densities (5, 10, 15) (mean values, n=4).

| Diet<br>Rearing<br>density | C      |        |        | O      |        |        |
|----------------------------|--------|--------|--------|--------|--------|--------|
|                            | 5      | 10     | 15     | 5      | 10     | 15     |
| Final larval weight (mg)   | 107.48 | 126.17 | 104.49 | 108.64 | 99.09  | 91.35  |
| Final larval biomass (g)   | 408.92 | 996.67 | 994.17 | 472.92 | 837.60 | 841.80 |
| Final frass biomass (g)    | 465.25 | 819.55 | 784.85 | 343.52 | 640.35 | 630.85 |
| Growth rate (mg/day)       | 13.10  | 12.16  | 9.45   | 11.40  | 6.38   | 5.68   |
| Substrate reduction (%)    | 80.90  | 83.18  | 83.89  | 85.90  | 86.85  | 87.05  |
| Feed Conversion Ratio      | 6.17   | 4.95   | 5.60   | 5.46   | 6.42   | 7.40   |
| WRI (%)                    | 13.48  | 10.40  | 10.48  | 12.27  | 7.89   | 7.91   |
| ECD (%)                    | 0.21   | 0.25   | 0.24   | 0.22   | 0.20   | 0.20   |
| Larval length (cm)         | 1.50   | 1.57   | 1.50   | 1.51   | 1.52   | 1.59   |
| Real FR (mg/larva/day)     | 133.34 | 100.00 | 66.67  | 114.29 | 72.73  | 48.48  |
| SuR (%) <sup>(*)</sup>     | 96.41  | 96.05  | 97.16  | 85.90  | 86.86  | 97.97  |

Abbreviations C: control diet, O: Omnivorous diet; 5: density of 5 larvae/cm<sup>2</sup>; 10: density of 10 larvae/cm<sup>2</sup>; 15: density of 15 larvae/cm<sup>2</sup>. WRI: waste reduction index; ECD: efficiency of conversion of digested food; SuR: survival rate (\*) see lines 209-210 for M&M.
